1 **Two novel loci underlie natural differences in *Caenorhabditis elegans***

2 **macrocyclic lactone responses**

3 Kathryn S. Evans<sup>1,2</sup>, Janneke Wit<sup>1</sup>, Lewis Stevens<sup>1,a</sup>, Steffen R. Hahnel<sup>1</sup>, Briana

4 Rodriguez<sup>1</sup>, Grace Park<sup>1</sup>, Mostafa Zamanian<sup>1,b</sup>, Shannon C. Brady<sup>1,2</sup>, Ellen Chao<sup>1</sup>,

5 Katherine Introcaso<sup>1</sup>, Robyn E. Tanny<sup>1</sup>, and Erik C. Andersen<sup>1,\*</sup>

6

7 <sup>1</sup>Molecular Biosciences, Northwestern University, Evanston, IL

8 <sup>2</sup>Interdisciplinary Biological Sciences Program, Northwestern University, Evanston, IL

9 <sup>a</sup>Present address: Tree of Life, Wellcome Sanger Institute, Cambridge CB10 1SA, UK

10 <sup>b</sup>Present address: Department of Pathobiological Sciences, School of Veterinary

11 Medicine, University of Wisconsin, Madison, Wisconsin 53705

12

13 **\*Corresponding author:**

14 E-mail: [erik.andersen@northwestern.edu](mailto:erik.andersen@northwestern.edu) (ECA)

## 15 **Abstract**

16 Parasitic nematodes cause a massive worldwide burden on human health along  
17 with a loss of livestock and agriculture productivity. Anthelmintics have been widely  
18 successful in treating parasitic nematodes. However, resistance is increasing, and little is  
19 known about the molecular and genetic causes of resistance. The free-living roundworm  
20 *Caenorhabditis elegans* provides a tractable model to identify genes that underlie  
21 resistance. Unlike parasitic nematodes, *C. elegans* is easy to maintain in the laboratory,  
22 has a complete and well annotated genome, and has many genetic tools. Using a  
23 combination of wild isolates and a panel of recombinant inbred lines constructed from  
24 crosses of two genetically and phenotypically divergent strains, we identified three  
25 genomic regions on chromosome V that underlie natural differences in response to the  
26 macrocyclic lactone (ML) abamectin. One locus was identified previously and encodes  
27 an alpha subunit of a glutamate-gated chloride channel (*glc-1*). Here, we validate and  
28 narrow two novel loci using near-isogenic lines. Additionally, we generate a list of  
29 prioritized candidate genes identified in *C. elegans* and in the parasite *Haemonchus*  
30 *contortus* by comparison of ML resistance loci. These genes could represent previously  
31 unidentified resistance genes shared across nematode species and should be evaluated  
32 in the future. Our work highlights the advantages of using *C. elegans* as a model to better  
33 understand ML resistance in parasitic nematodes.

## 34 **Author Summary**

35 Parasitic nematodes infect plants, animals, and humans, causing major health and  
36 economic burdens worldwide. Parasitic nematode infections are generally treated  
37 efficiently with a class of drugs named anthelmintics. However, resistance to many of  
38 these anthelmintic drugs, including macrocyclic lactones (MLs), is rampant and  
39 increasing. Therefore, it is essential that we understand how these drugs act against  
40 parasitic nematodes and, conversely, how nematodes gain resistance in order to better  
41 treat these infections in the future. Here, we used the non-parasitic nematode  
42 *Caenorhabditis elegans* as a model organism to study ML resistance. We leveraged  
43 natural genetic variation between strains of *C. elegans* with differential responses to  
44 abamectin to identify three genomic regions on chromosome V, each containing one or  
45 more genes that contribute to ML resistance. Two of these loci have not been previously  
46 discovered and likely represent novel resistance mechanisms. We also compared the  
47 genes in these two novel loci to the genes found within genomic regions linked to ML  
48 resistance in the parasite *Haemonchus contortus* and found several cases of overlap  
49 between the two species. Overall, this study highlights the advantages of using *C.*  
50 *elegans* to understand anthelmintic resistance in parasitic nematodes.

## 51 **Introduction**

52 Parasitic nematodes pose a significant health and economic threat, especially in  
53 the developing world [1–3]. These infections increase morbidity and exacerbate the  
54 deleterious effects of malaria, HIV, and tuberculosis [4]. Morbidity varies in severity but  
55 commonly affects people in tropical and subtropical regions. It is estimated that over one  
56 billion people are infected by one or more species of parasitic roundworm [5], and the  
57 loss of disability-adjusted life years caused by these parasites ranks among the top of all  
58 Neglected Tropical Diseases [1]. In addition to their devastating impacts on human health,  
59 several parasitic nematode species infect a variety of crops and livestock. These  
60 infections cause severe economic burdens worldwide [6].

61 Parasitic nematodes are primarily treated using a limited number of anthelmintic  
62 drugs from one of the three major drug classes: benzimidazoles, nicotinic acetylcholine  
63 receptor agonists, and macrocyclic lactones (MLs). However, the efficacies of these  
64 anthelmintics can be limited by the ubiquitous resistance observed in veterinary parasites  
65 [7] and the emerging resistance in human parasites [8,9]. In many cases, resistance is  
66 highly heritable, suggesting the evolution of anthelmintic-resistant nematodes might occur  
67 under drug selection [10]. We must understand the drug mode of action and identify the  
68 genetic loci that contribute to resistance in parasitic nematodes to provide effective long-  
69 term treatments. Abamectin and ivermectin are two common MLs used to treat parasitic  
70 nematodes of agricultural, veterinary, or human importance [11]. However, widespread  
71 resistance to MLs has been reported and is a significant concern [10]. Genetic screens  
72 and selections performed in the laboratory-adapted reference strain of the free-living  
73 nematode *Caenorhabditis elegans* have identified three genes that encode glutamate-

74 gated chloride (GluCl) channel subunits (*glc-1*, *avr-14*, and *avr-15*) and are targeted by  
75 MLs in *C. elegans* [12,13]. In contrast to *C. elegans* laboratory experiments, several  
76 resistant parasitic nematode isolates have been discovered that do not have mutations in  
77 genes that encode GluCl subunits [14,15], suggesting that alternative mechanisms of  
78 resistance to MLs must exist. Recently, quantitative trait loci (QTL) mappings in both free-  
79 living and parasitic nematode species have identified several genomic regions of interest  
80 containing genetic variation that confers drug resistance [14,16–20].

81         The identification of specific genes or variants involved in the molecular basis of  
82 drug resistance in parasitic nematodes can be challenging for several reasons. First, their  
83 life-cycles require hosts and are costly to maintain [21]. Second, most species do not  
84 have annotated genomes assembled into full chromosomes. To date, the most complete  
85 genome is *Haemonchus contortus*, which enables genetic mappings and comparative  
86 genomic approaches [14,22]. Finally, most species lack key molecular and genetic tools  
87 such as CRISPR-Cas9 genome editing [23]. By contrast, the free-living nematode *C.*  
88 *elegans* has a short life cycle that is easy to grow in the laboratory, a well annotated  
89 reference genome, and a plethora of molecular and genetic tools to characterize  
90 anthelmintic responses [19,20,24–26]. Genetic mappings using hundreds of genetically  
91 and phenotypically diverged wild strains of *C. elegans* collected around the world could  
92 identify novel loci that contribute to anthelmintic resistance across natural populations  
93 [20,24].

94         Here, we use genome-wide association and linkage mapping analyses to identify  
95 three large-effect QTL on chromosome V that contribute to abamectin resistance. One of  
96 these QTL was previously identified and is known to be caused by variation in the GluCl

97 channel gene *glc-1* [24,26]. The remaining two QTL are novel. We used near-isogenic  
98 lines (NILs) to validate and narrow each QTL independently and identified promising  
99 candidate genes to test using CRISPR-Cas9 genome editing. We searched for  
100 orthologous genes within ivermectin-response QTL on chromosome V of *H. contortus* and  
101 discovered 40 genes present in QTL for both species. This study demonstrates the value  
102 of natural variation in the *C. elegans* population to identify candidate genes for resistance  
103 and enables understanding of the molecular mechanisms of anthelmintic resistance.

104

## 105 **Results**

### 106 **Two different quantitative genetic mapping techniques reveal loci that underlie** 107 **differential responses to abamectin**

108 Anthelmintic resistance can be described as a function of nematode development  
109 and reproduction. To quantify *C. elegans* drug resistance, we previously developed a  
110 high-throughput assay that uses a flow-based device to measure the development and  
111 reproduction of thousands of animals across hundreds of independent strains (see  
112 Methods) [19,20,27–33]. In this assay, nematode development is described by a  
113 combination of animal length, animal optical density (body thickness and composition  
114 integrated by length), and normalized animal optical density (body thickness and  
115 composition normalized by length). Although length and optical density are often highly  
116 correlated, these three traits can each describe a unique aspect of development [31]. In  
117 addition to development, this assay describes nematode reproduction by an  
118 approximation of animal brood size. Using this assay, we exposed four genetically  
119 divergent strains (N2, CB4856, JU775, and DL238) to increasing doses of abamectin (**S1**

120 **File**). In the presence of abamectin, nematodes were generally smaller, less optically  
121 dense, and produced smaller broods compared to non-treated nematodes, suggesting an  
122 abamectin-induced developmental delay and decreased reproduction (**S1 Fig**). We also  
123 observed significant phenotypic variation among strains in response to abamectin,  
124 indicating that genetic variation might underlie differences in the abamectin response  
125 across the *C. elegans* species.

126 To investigate the genetic basis of natural abamectin resistance, we exposed 210  
127 wild isolates to abamectin and measured their developmental rates and brood sizes (**S2**  
128 **File**). These data were used to perform genome-wide association mappings that identified  
129 a total of six QTL across the four traits on chromosomes II, III, and V (**S2 Fig, S3 File**).  
130 The most significant QTL was detected for brood size on the right arm of chromosome V  
131 (VR) and was also detected for animal length (**Fig 1A**). Notably, this region (**Table 1**)  
132 includes a gene (*glc-1*) that encodes a subunit of a glutamate-gated chloride (GluCl)  
133 channel, which has been previously discovered to underlie phenotypic differences in both  
134 swimming paralysis [24] and survival [26] in the presence of abamectin. Additionally, a  
135 second QTL on the left arm of chromosome V (VL) underlies differences in both animal  
136 length and optical density (**Fig 1A, S2 Fig, S3 File**). This secondary region (**Table 1**) has  
137 not been identified in previous *C. elegans* QTL mapping studies [24,26] and thus can be  
138 considered a novel region underlying abamectin response.

139

140

141

142

143 **Table 1. Genomic regions on chromosome V significantly correlated with**  
144 **abamectin resistance.**

| QTL                              | Association mapping <sup>1</sup> | Linkage mapping <sup>2</sup> | NIL-defined interval  |
|----------------------------------|----------------------------------|------------------------------|-----------------------|
| VL                               | V:1,757,246-4,333,001            | V:2,629,324-3,076,312        | V:1-3,120,167         |
| VC                               | NA                               | V:6,118,360-7,342,129        | V:5,260,997-5,906,132 |
| VR ( <i>glc-1</i> ) <sup>3</sup> | V:15,983,112-16,599,066          | V:15,933,659-16,336,743      | 13,678,801-19,303,558 |

145 <sup>1</sup>Mean animal length

146 <sup>2</sup>Mean animal optical density

147 <sup>3</sup>From previous data [24]

148

149 In parallel to the genome-wide association mapping, we measured animal  
150 development and reproduction in abamectin for a panel of 225 recombinant inbred  
151 advanced intercross lines (RIAILs) generated by a cross between the N2 and CB4856  
152 strains [31] (**S4 File**). Linkage mapping analysis for all four traits identified a total of 14  
153 QTL on chromosomes II, V, and X including three distinct QTL on chromosome V (**Fig**  
154 **1B, S3 Fig, S5 File**). Two of the three QTL on chromosome V (VL and VR) overlap with  
155 the intervals identified using association mapping (**Fig 1C, Table 1, S4 Fig, S7 File**),  
156 suggesting that a single variant both present in the CB4856 strain and prevalent within  
157 the natural population might cause the differences in abamectin responses observed in  
158 both mapping populations. In fact, a four-amino-acid deletion in the gene *glc-1* that has  
159 been previously correlated with abamectin resistance is known to segregate not only  
160 among the *C. elegans* population but also between the N2 and CB4856 strains [24,26].  
161 By contrast, the third locus on the center of chromosome V (VC) was only detected using  
162 linkage mapping, which suggests that a rare variant in the CB4856 strain underlies this  
163 QTL. Regardless, all three loci on chromosome V can be investigated further by  
164 leveraging the genetic variation between the N2 and CB4856 strains. At each of the three  
165 loci on chromosome V, RIAILs with the CB4856 allele were correlated with abamectin



166 resistance (longer and denser animals) compared to RIALs with the N2 allele (**S3 Fig**,  
167 **S4 and S5 Files**). To search for evidence of any genetic interactions between loci, we  
168 performed a two-dimensional genome scan. We found no significant interactions on  
169 chromosome V or otherwise (**S5 Fig, S6 File**), suggesting that each of the three loci  
170 additively contribute to abamectin resistance.  
171

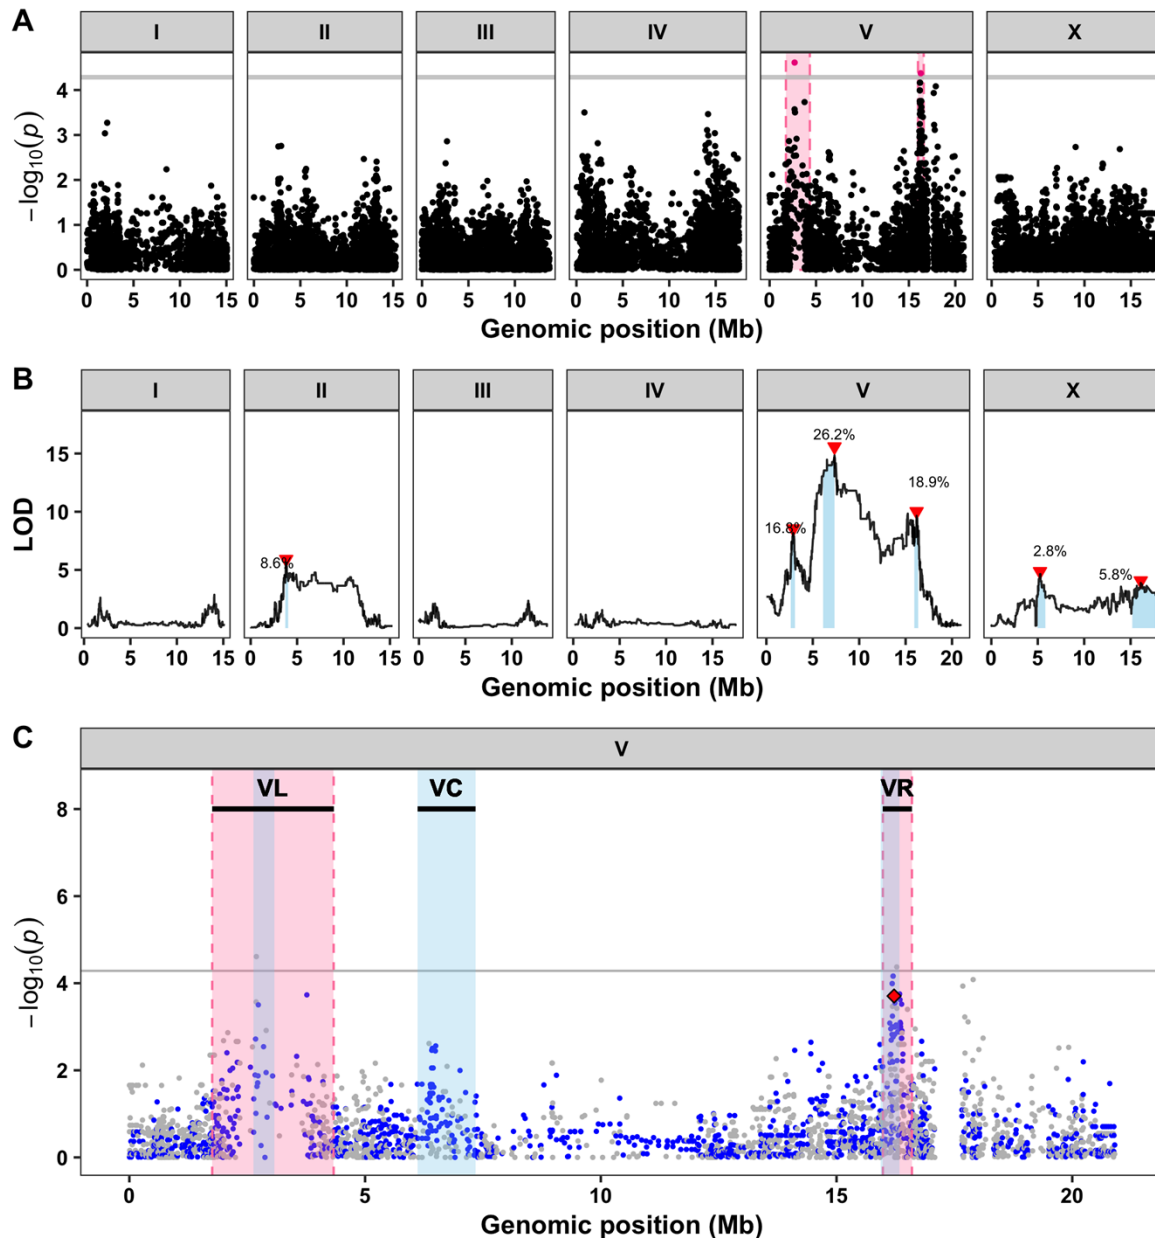

172

173 **Fig 1. Three large-effect QTL on chromosome V control differences in abamectin responses. A)**  
174 Genome-wide association mapping results for animal length (mean.TOF) are shown. Genomic position (x-  
175 axis) is plotted against the  $-\log_{10}(p)$  value (y-axis) for each SNV. SNVs are colored pink if they pass the  
176 genome-wide eigen-decomposition significance threshold designated by the grey line. The genomic regions  
177 of interest that pass the significance threshold are highlighted by pink rectangles. **B)** Linkage mapping  
178 results for optical density (mean.EXT) are shown. Genomic position (x-axis) is plotted against the logarithm  
179 of the odds (LOD) score (y-axis) for 13,003 genomic markers. Each significant QTL is indicated by a red  
180 triangle at the peak marker, and a blue rectangle covers the 95% confidence interval around the peak  
181 marker. The percentage of the total variance in the RIAL population that can be explained by each QTL is  
182 shown above the QTL. **C)** Fine mapping of all common variants on chromosome V is shown. Genomic  
183 position (x-axis) is plotted against the  $-\log_{10}(p)$  values (y-axis) for each variant and colored by the genotype  
184 of the variant in the CB4856 strain (grey = N2 reference allele, blue = variation from the N2 reference allele).  
185 Genomic regions identified from linkage mapping analysis are highlighted in blue and genomic regions  
186 identified from association mapping are highlighted in pink. The horizontal grey line represents the genome-  
187 wide eigen-decomposition significance threshold. The red diamond represents the most significant variant  
188 in the gene *glc-1*.  
189

## 190 **Near-isogenic lines validate the independent abamectin-resistance loci on** 191 **chromosome V**

192 To empirically validate if genetic variation on chromosome V between the N2 and  
193 CB4856 strains contributes to abamectin resistance, we first generated chromosome  
194 substitution strains in which the entire chromosome V from the CB4856 strain was  
195 introgressed into the N2 genetic background or vice versa (**S8 and S9 Files**). We  
196 measured the development and reproduction of these strains and observed that the  
197 genotype on chromosome V significantly contributed to differences in abamectin  
198 resistance (**S10 File**). The strain with the CB4856 genotype on chromosome V  
199 introgressed into the N2 genetic background was significantly more resistant than the  
200 sensitive N2 strain (Tukey's HSD,  $p$ -value =  $2.47e-06$ ) (**S6 Fig, S10 and S11 Files**).  
201 Similarly, the strain with the N2 chromosome V introgressed into the CB4856 genetic  
202 background was significantly more sensitive to abamectin compared to the resistant  
203 CB4856 strain (Tukey's HSD,  $p$ -value = 0.0041, **S6 Fig, S10 and S11 Files**). These  
204 results confirm that genetic variation between the N2 and CB4856 strains at one or more

205 loci on chromosome V contributes to the difference in abamectin resistance between  
206 these strains.

207 To demonstrate that genetic variation outside the *glc-1* locus contributes to the  
208 overall resistance phenotype observed in the chromosome substitution strains, we next  
209 generated a near-isogenic line (NIL) that contains the resistant CB4856 alleles at both  
210 the VL and VC loci and the sensitive N2 allele at the VR *glc-1* locus (**Fig 2A, S8 and S9**  
211 **Files**). When tested, we observed that this NIL (ECA1059) was significantly more  
212 resistant to abamectin than the sensitive N2 strain (Tukey's HSD,  $p$ -value =  $8.83e-14$ )  
213 and less resistant than the resistant CB4856 strain (Tukey's HSD,  $p$ -value =  $1.57e-13$ ,  
214 **Fig 2B, S11 and S12 Files**). This result indicates that genetic variation on the left and/or  
215 center of chromosome V contributes to the differences in abamectin resistance between  
216 the N2 and CB4856 strains.

217 To further isolate the VL and VC QTL independently, we generated three NILs that  
218 each contain approximately 5 Mb of the CB4856 genome introgressed into the N2 genetic  
219 background at different locations on chromosome V so that they tile across the  
220 introgressed region in ECA1059 (**Fig 2A, S8 and S9 Files**). The strain ECA232 was not  
221 significantly more resistant to abamectin compared to the N2 strain (Tukey's HSD,  $p$ -  
222 value = 0.997), suggesting that this NIL has the sensitive N2 alleles at all three loci on  
223 chromosome V (**Fig 2B, S11 and S12 Files**). Alternatively, both ECA1065 and ECA377  
224 were significantly more resistant to abamectin than the N2 strain (Tukey's HSD,  $p$ -values  
225 =  $1.45e-13$  and  $5.44e-09$ , respectively), suggesting that the introgressed regions in both  
226 of these NILs contain one or more resistant loci (**Fig 2B, S11 and S12 Files**).  
227 Furthermore, because both strains are less resistant than the NIL with two CB4856 alleles

228 (ECA1059-ECA1065  $p$ -value =  $8.83e-14$  (Tukey's HSD), ECA1059-ECA377  $p$ -value =  
 229  $8.83e-14$  (Tukey's HSD)), we can deduce that ECA1065 and ECA377 each contain one  
 230 resistant locus (**Fig 2B, S11 and S12 Files**). The introgressions in these two NILs overlap  
 231 by 1.3 Mb, which leaves two possibilities: either this overlapped region (V:3,120,168-  
 232 4,446,729) contains a single QTL shared by the two NILs or each NIL validates a separate  
 233 QTL within the non-overlapping introgressed regions. Because we identified three QTL  
 234 from linkage mapping, we believe the latter case in which ECA1065 has the CB4856 allele  
 235 for the VL locus and ECA377 has the CB4856 allele for the VC locus (**Table 1, S7 Fig**).  
 236

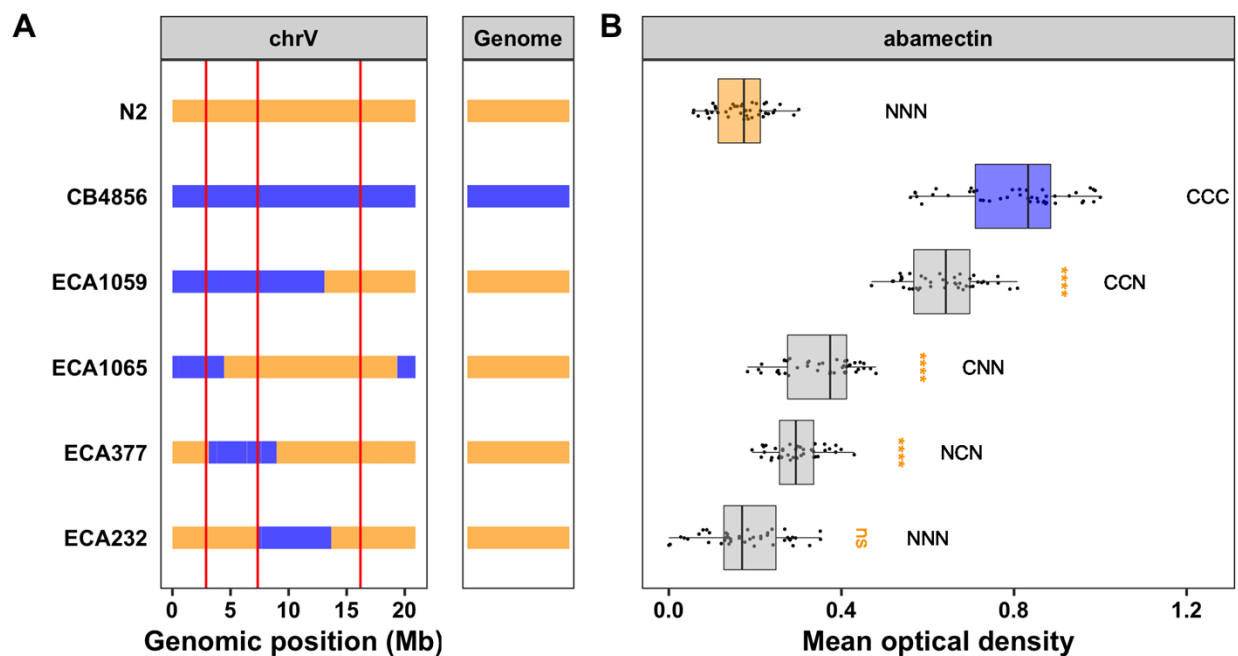

237

238 **Fig 2. Near-isogenic lines confirm the additive effects of all three QTL.** **A)** Strain genotypes are shown  
 239 as colored rectangles (N2: orange, CB4856: blue) in detail for chromosome V (left box) and in general for  
 240 the rest of the chromosomes (right box). The solid vertical lines represent the peak marker of each QTL. **B)**  
 241 Normalized residual mean optical density in abamectin (mean.EXT, x-axis) is plotted as Tukey box plots  
 242 against strain (y-axis). Statistical significance of each NIL compared to N2 calculated by Tukey's HSD is  
 243 shown above each strain (ns = non-significant ( $p$ -value > 0.05), \*\*\* = significant ( $p$ -values < 0.0001)).  
 244 Predicted genotypes at the three QTL are shown above each strain from VL to VC to VR (N = N2 allele, C  
 245 = CB4856 allele).

246

247           The VL QTL is contained within the CB4856 introgression in the NIL ECA1065 and  
248 is defined by the CB4856 introgression in the NIL ECA377 (V:1-3,120,167). This NIL-  
249 defined interval overlaps with the genomic regions identified from both linkage and  
250 association mapping (**S7 Fig, Table 1**). Using the smallest of these overlapping regions  
251 (V:2,629,324-3,076,312), we identified a total of 164 genes in the interval. A change in  
252 phenotype is most commonly driven by either genetic variation that alters the amino acid  
253 sequence of a protein (protein-coding genetic variation) or genetic variation that affects  
254 expression of one or more genes (expression variation). Using previously published gene  
255 expression data [32,34] and genetic variant data accessed from the *C. elegans* Natural  
256 Diversity Resource (CeNDR; [elegansvariation.org](http://elegansvariation.org)), we eliminated 61 candidate genes  
257 because 26 genes did not harbor any genetic variation between the N2 and CB4856  
258 strains and 35 genes had no protein-coding or expression variation. The remaining 103  
259 candidate genes had either protein-coding or expression variation linked to this region  
260 (**S13 File**). Although none of these 103 genes encode a GluCl channel, three genes with  
261 variation in expression between the N2 and CB4856 strains do encode a cytochrome  
262 P450 (*cyp-35C1*, *cyp-33E3*, and *cyp-33E2*) and one encodes a UDP-glycosyltransferase  
263 (*ugt-53*). Previous studies have shown an upregulation of such metabolic genes in  
264 response to benzimidazole treatment [35]. Therefore, it is possible that differential  
265 expression of key metabolic genes between the N2 and CB4856 strains causes variation  
266 in abamectin resistance.

267           To further test the role of gene expression variation in the abamectin resistance  
268 phenotype, we measured animal development and reproduction in abamectin for 107

269 RIALs for which we had existing gene expression data [32,34] (**S14 File**) and performed  
270 mediation analysis for each of the 28 genes with an eQTL in the region (**S8 Fig, S15 File**).  
271 The top three candidates from this analysis included a gene with unknown function  
272 (*F54E2.1*), an NADH Ubiquinone Oxidoreductase (*nuo-5*), and *ugt-53*. The gene *nuo-5* is  
273 a NADH-ubiquinone oxidoreductase and part of the mitochondrial complex I [36,37].  
274 Animals deficient for *nuo-5* are more sensitive to the anthelmintic levamisole, and have  
275 defective cholinergic synaptic function [37]. Interestingly, the CB4856 strain has lower  
276 expression of both *nuo-5* and *ugt-53*, which suggests that if either of these genes are  
277 causal it is likely through an indirect mechanism. Regardless, we have previously shown  
278 that mediation analysis is a strong tool for predicting candidate genes with expression  
279 variation [32,38], and this analysis provides more evidence for the potential role of *ugt-53*  
280 or *nuo-5* in the abamectin response. However, it is important to note that this genomic  
281 interval also lies within a hyper-divergent region of the genome marked by extremely high  
282 levels of structural and single-nucleotide variation in the CB4856 strain as well as many  
283 other strains [39]. This extreme level of genetic variation could, in some cases, even  
284 cause a different composition of genes than found in the N2 reference strain. Because  
285 candidate gene predictions could be highly impacted by this divergent region, we turned  
286 our focus to the VC QTL.

287         The VC QTL is contained within the CB4856 introgression in the NIL ECA377 and  
288 is defined by the CB4856 introgressions in the NILs ECA1065 and ECA232 (V:4,446,729-  
289 7,374,928) (**Fig 2, S7 Fig**). This large 3 Mb interval overlaps with the genomic region  
290 identified using linkage mapping (**S7 Fig, Table 1**). We next attempted to narrow this  
291 region further by generating additional NILs with smaller introgressions (**Fig 3A, S8 and**

292 **S9 Files**) and measuring the abamectin resistance of these strains. All four NILs with the  
293 CB4856 introgression on the center of chromosome V were significantly more resistant  
294 (as defined by nematode length) than the N2 strain (Tukey's HSD,  $p$ -values < 2.83e-06,  
295 **Fig 3, S11 and S16 Files**). The results for optical density were similar, but the variation  
296 within strains was higher (**S9 Fig, S11 and S16 Files**). These results suggest that the  
297 QTL position is contained within the smallest introgression, ECA632 (V:5,260,997-  
298 5,906,132) (**Table 1, S7 Fig**). Interestingly, this NIL-defined genomic region does not  
299 overlap with the confidence interval identified using linkage mapping (**Table 1, S7 Fig**).  
300 Regardless, we prioritized 103 potential candidate genes with either protein-coding  
301 variation and/or variation in gene expression linked to this 645 kb region (**S13 File**).  
302 Notably, the glutamate-gated chloride channel, *glc-3*, resides within this narrowed region  
303 (V:5,449,287, **S7 Fig**). GLC-3 was shown to be activated by ivermectin when  
304 heterologously expressed in *Xenopus laevis* oocytes [40]. However, it has yet to be  
305 identified in mutant screens nor directly tested for ML resistance in *C. elegans*. The  
306 CB4856 strain has three rare variants in *glc-3*, including a single missense variant  
307 (I439F). It is possible that one or more of these variants causes increased resistance to  
308 abamectin in the CB4856 strain. In addition to *glc-3*, this list of prioritized candidate genes  
309 includes one cytochrome P450 (*cyp-35B2*) and two UDP-glycosyltransferases (*ugt-51*  
310 and *H23N18.4*). Mediation analysis for the 48 genes with an eQTL that maps to this region  
311 highlighted several potential candidates, most noticeably *H23N18.4* (**S8 Fig, S15 File**).  
312 Variation in one or more of these genes might contribute to differences in abamectin  
313 resistance between the N2 and CB4856 strains.  
314



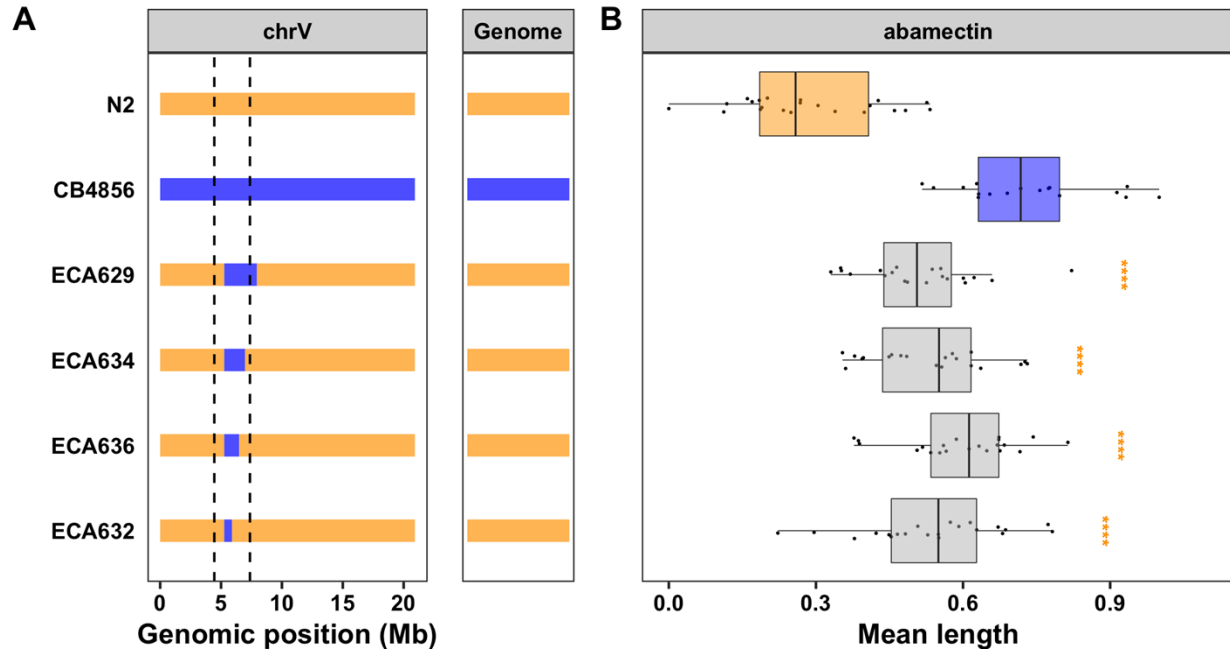

315

316 **Fig 3. NILs isolate and narrow the VC QTL. A)** Strain genotypes are shown as colored rectangles (N2:  
317 orange, CB4856: blue) in detail for chromosome V (left) and in general for the rest of the chromosomes  
318 (right). The dashed vertical lines represent the previous NIL-defined QTL interval for VC. **B)** Normalized  
319 residual mean animal length in abamectin (mean.TOF, x-axis) is plotted as Tukey box plots against strain  
320 (y-axis). Statistical significance of each NIL compared to N2 calculated by Tukey's HSD is shown above  
321 each strain (ns = non-significant (p-value > 0.05), \*\*\* = significant (p-values < 0.0001)).

322

### 323 The candidate gene *lgc-54* likely does not cause macrocyclic lactone resistance

324 Several previous studies in parasitic nematode species have identified QTL and  
325 candidate genes that might underlie responses to ivermectin, an ML closely related to  
326 abamectin. Introgression mapping in the sheep parasite *Teladorsagia circumcincta*  
327 identified several candidate genes, including the ortholog of the *C. elegans* gene *lgc-54*  
328 [16], but this genome is highly fragmented and genomic locations are likely not correct.  
329 Regardless, this gene, similar to *glc-1*, encodes a ligand-gated chloride channel, but it  
330 has yet to be directly implicated in ML resistance. Interestingly, *lgc-54* is on the center of  
331 the *C. elegans* chromosome V (6.8 Mb) within the confidence interval for the VC QTL  
332 defined by the linkage mapping experiment but outside the NIL-defined interval (**Table 1,**



333 **S7 Fig**). Furthermore, the CB4856 strain harbors several genetic variants in this gene,  
334 including a single missense variant (H42R) unique to the CB4856 strain. To test if *lgc-54*  
335 plays a role in abamectin resistance in *C. elegans*, we exposed two independent *lgc-54*  
336 mutants to abamectin and measured animal development and reproduction. Both *lgc-54*  
337 mutants were significantly more resistant than the N2 strain (Tukey's HSD,  $p$ -values <  
338 0.0004), which would normally provide evidence for the role of *lgc-54* in abamectin  
339 resistance (**Fig 4A, S11 and S17 Files**). However, we noticed that these mutants grew  
340 much slower in the control conditions than both the N2 and CB4856 strains (**Fig 4B, S17**  
341 **File**). This growth defect suggests that the observed resistance is likely an artifact of the  
342 statistical regression analysis, suggesting that *lgc-54* does not play a role in abamectin  
343 resistance. Regardless, this system provides a strong platform for experimentally  
344 validating putative resistance alleles from parasitic nematodes.

345

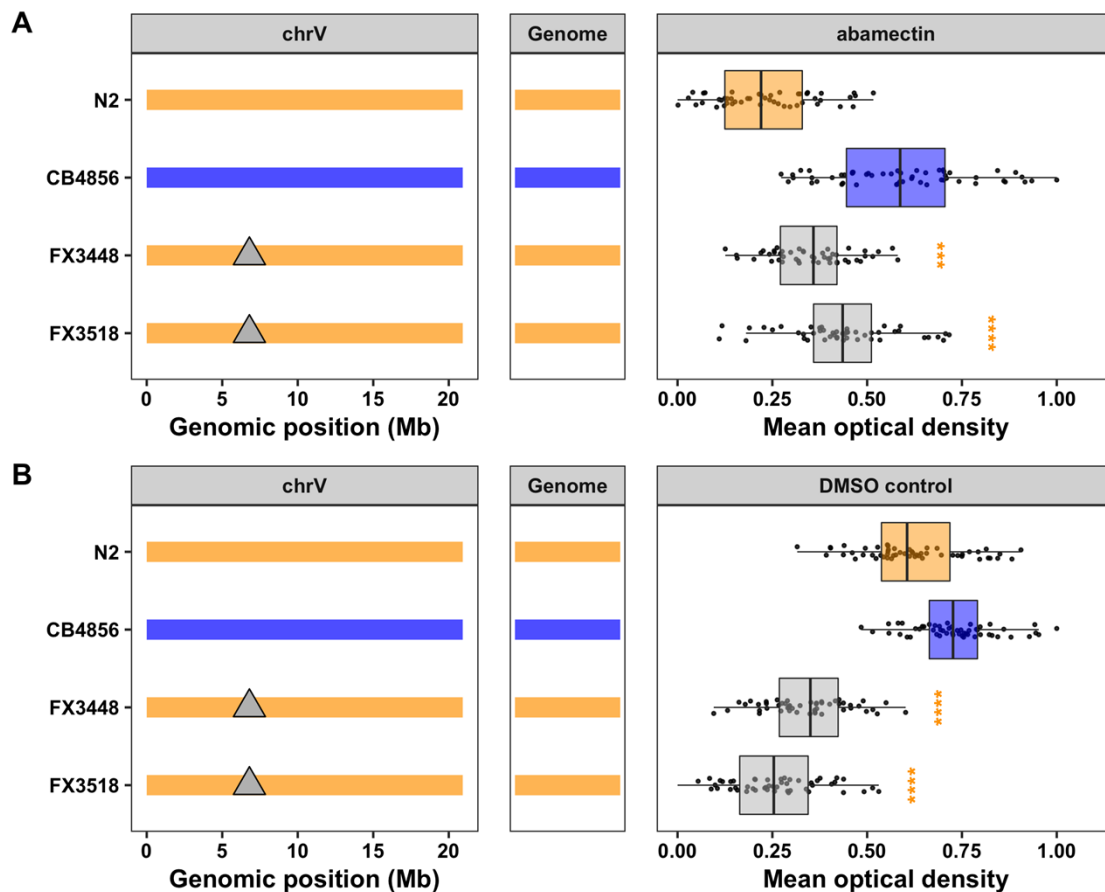

346

347 **Fig 4. Testing the role of *Igc-54* in the *C. elegans* abamectin response.** Strain genotypes are shown as  
 348 colored rectangles (N2: orange, CB4856: blue) in detail for chromosome V (left) and in general for the rest  
 349 of the chromosomes (center). Grey triangles represent mutations in the *Igc-54* gene. On the right,  
 350 normalized residual mean optical density in abamectin (mean.EXT, x-axis) **(A)** or normalized mean optical  
 351 density in DMSO control **(B)** is plotted as Tukey box plots against strain (y-axis). Statistical significance of  
 352 each deletion strain compared to N2 calculated by Tukey's HSD is shown above each strain (ns = non-  
 353 significant ( $p$ -value > 0.05), \*\*\*\* = significant ( $p$ -value < 0.0001)).  
 354

### 355 **Overlap of *C. elegans* and parasitic nematode candidate genes for macrocyclic** 356 **lactone resistance**

357 Recently, two large-effect QTL on chromosome V (37-42 Mb and 45-48 Mb) were  
 358 identified in response to ivermectin treatment in *H. contortus*, a gastrointestinal parasite  
 359 of small ruminants [14]. The authors found that these regions did not contain any  
 360 orthologs of candidate ML resistance genes identified in *C. elegans* previously. Because  
 361 the QTL for MLs in both species are found on chromosome V and the chromosomal gene

362 content is conserved between *C. elegans* and *H. contortus* [22], orthologs present in the  
363 QTL of both species can suggest conserved resistance mechanisms. To compare the  
364 genes in the newly defined QTL (VL and VC) to those ivermectin QTL defined for *H.*  
365 *contortus*, we identified one-to-one orthologs across the two species and compared  
366 chromosomal positions (**Fig 5, S18 File**). For this analysis, larger and more conservative  
367 genomic regions were selected to represent the *C. elegans* QTL (V:1-3,120,167 and  
368 V:5,260,997-7,342,129). Consistent with previous work that found that linkage groups are  
369 highly conserved but synteny (or gene order) is not [14], we found that the genes within  
370 the *C. elegans* QTL are distributed throughout the *H. contortus* chromosome V, with only  
371 40 (21.62%) of the 185 one-to-one orthologs present in one of the two *H. contortus* QTL.  
372 Regardless, we investigated functional annotations of the one-to-one orthologs shared  
373 between the QTL and found that none have annotations that have previously been  
374 associated with ML resistance.

375         However, genes associated with anthelmintic resistance can be members of large  
376 gene families, like UDP-glycosyltransferases (UGTs) or cytochrome P450 enzymes  
377 (CYPs), and often do not have one-to-one orthologs. For this reason, we searched for  
378 orthogroups with more than one gene in one or both species within both QTL (**S19 File**).  
379 The complexity of comparing gene families between *C. elegans* and *H. contortus* prohibits  
380 searches for each of the 1169 genes in the VL and VC regions. Therefore, we narrowed  
381 our comparison to include one-to-many, many-to-one, and many-to-many orthologs of  
382 previously described *C. elegans* candidate genes. This approach identified orthologs for  
383 the CYP and UGT families in the *C. elegans* QTL, but none were present in the *H.*  
384 *contortus* QTL. Additionally, we investigated two candidate genes, *glc-3* and *nuo-5*, that

385 we identified in this study. The glutamate-gated chloride channel subunit gene, *glc-3*, is  
386 located in the VC region. It has a one-to-one ortholog on *H. contortus* chromosome V, but  
387 this ortholog, *HCON\_00148840*, is located to the left of the *H. contortus* QTL region (27.6  
388 Mb). However, the QTL location and confidence intervals depend on the underlying  
389 statistics and studied populations, so this candidate gene could still play a role in *H.*  
390 *contortus*. Alternatively, the one-to-one ortholog of the NADH ubiquinone oxidoreductase  
391 gene, *nuo-5*, is found on the far left of *H. contortus* chromosome V (2.47 Mb) and is  
392 unlikely to underlie the *H. contortus* QTL. Overall, our analysis indicates some orthologs  
393 are shared between QTL or neighboring regions from the two species. These orthologs  
394 should be prioritized for further studies of ML resistance.

395

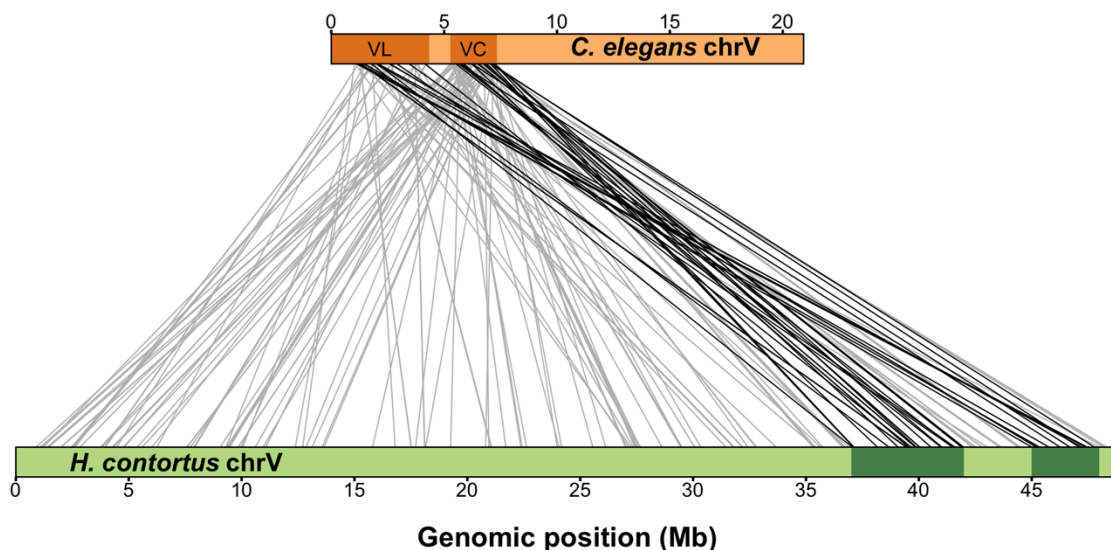

396

397

398 **Fig 5. Synteny between major-effect *C. elegans* abamectin QTL and *H. contortus* ivermectin QTL on**  
399 **chromosome V.** Synteny plot showing orthologous genes between *C. elegans* (top) and *H. contortus*  
400 (bottom) chromosome V. Genomic regions of interest are highlighted with dark orange (*C. elegans*) or dark  
401 green (*H. contortus*) rectangles, and orthologous gene pairs are represented by connecting lines. Only  
402 genes that lie within either the VL or VC *C. elegans* QTL with a one-to-one ortholog on *H. contortus*  
403 chromosome V are shown (185 pairs). Grey lines represent a gene pair where the *H. contortus* ortholog is

404 not within a region of interest (145 pairs), and black lines represent a gene pair where the *H. contortus*  
405 ortholog is within a region of interest (40 pairs).  
406

## 407 **Discussion**

408 In this study, we used *C. elegans* genome-wide association and linkage mapping  
409 analyses to identify three QTL on chromosome V that influence responses to the ML  
410 abamectin. One of these QTL overlaps with the previously identified GluCl gene *glc-1*  
411 [24,26]. However, the remaining two QTL are novel and might overlap with ivermectin  
412 QTL from parasitic nematodes, showing the power of using *C. elegans* to discover  
413 conserved ML resistance genes. We used NILs to validate and narrow each QTL  
414 independently. Additionally, we compared genes in our QTL with genes in two ivermectin  
415 QTL for *H. contortus* [14] and identified 40 shared orthologs. However, none of these 40  
416 genes were strong candidates based on previous implications in ML resistance. Although  
417 we were unable to discover the specific causal genes or variants, we suggest several  
418 candidate genes within the narrowed genomic intervals that could play roles in ML  
419 resistance.

420

### 421 **Different mapping populations and techniques detect both similar and distinct QTL**

422 Abamectin resistance has now been mapped in *C. elegans* using three different  
423 experimental mapping techniques, five mapping populations, and several distinct traits  
424 [24,26]. Common to all these studies is the large-effect QTL detected on the right arm of  
425 chromosome V (VR locus), likely controlled by natural genetic variation in the gene *glc-1*.  
426 Here, we validated that genetic variation on the right arm of chromosome V contributes  
427 to abamectin resistance using NILs. However, further validation of the specific variants

428 that affect the function of *glc-1* in ML response is still needed. Regardless, the overlap of  
429 QTL between these three studies and across mapping populations suggest that the  
430 causal variant is commonly occurring and has a strong effect on ML resistance in *C.*  
431 *elegans* across a variety of traits.

432 Unlike the previous two *C. elegans* abamectin resistance mappings, we identified  
433 several additional QTL, most significantly two novel QTL on chromosome V (VL and VC).  
434 Because the previous studies that only detected *glc-1* measured swimming paralysis and  
435 survival in abamectin, it is possible that the VL and VC novel QTL could underlie  
436 differences in nematode development as measured in the high-throughput growth and  
437 fecundity assay performed here. These differences in traits and underlying QTL could  
438 suggest a complex nematode response to MLs. Although the GluCl-encoding gene, *glc-*  
439 *1*, underlies many of the differences across *C. elegans* strains, we show that these other  
440 loci underlie differences in development and physiology independent of *glc-1*.

441 The VL QTL was detected using both linkage and association mapping. The  
442 overlap of QTL from these two distinct mapping methods suggests that, like *glc-1*, genetic  
443 variation in the CB4856 strain is also found commonly across the species. Alternatively,  
444 the VC QTL was detected only with linkage mapping analysis, suggesting that either the  
445 causal variant in the CB4856 strain is rare across the species or does not cause a  
446 resistant phenotype in other wild strains. We used near-isogenic lines (NILs) to empirically  
447 validate both QTL independently. Interestingly, we show that a 645 kb region located  
448 outside of the statistically defined linkage mapping confidence interval is sufficient to  
449 cause resistance in an otherwise sensitive genetic background. Although several reasons  
450 could account for this discrepancy, it is likely that several small-effect loci on the center

451 of chromosome V each contribute to the overall abamectin-resistance phenotype  
452 observed in the CB4856 strain. In the recombinant population, all of these loci are jointly  
453 evaluated causing the QTL to be defined at a specific location. However, NILs are able  
454 to isolate small regions of the genome and these multiple effects can now be detected  
455 independently [38,41]. This study emphasizes that, although powerful, QTL mapping is  
456 ultimately a statistical method that can be influenced by experimental differences and that  
457 it is essential to validate QTL before drawing conclusions about the genomic location of  
458 the causal variant. Although validating QTL can be difficult in many parasitic nematode  
459 species, our ability to validate QTL in *C. elegans* is a strength of this model organism,  
460 emphasizing the need for the parasitic nematode and *C. elegans* communities to work  
461 together to push forward a cycle of discovery to understand anthelmintic modes of action  
462 and mechanisms of resistance [23].

463

464 **Shared niches provide the same selective pressures for soil transmitted**  
465 **helminths and *C. elegans***

466 The potential overlap of QTL for ML resistance between *C. elegans* and parasitic  
467 nematodes suggests that the loci that confer resistance to MLs could be conserved  
468 across several nematode species. It is believed that parasitic nematodes are resistant to  
469 anthelmintic drugs because high levels of standing genetic variation harbor existing  
470 resistance alleles in a population [42,43]. Soil transmitted helminths such as *H. contortus*,  
471 spend part of their life cycle in soil or rotting vegetation, an environment that overlaps with  
472 the niche associated with the free-living *C. elegans* [44,45]. Selective pressures in this  
473 environment could originate from natural toxic compounds produced by soil-dwelling

474 bacteria and fungi from which many anthelmintic drugs are derived [46–48]. MLs, like  
475 abamectin and ivermectin, are fermentation products of *Streptomyces avermitilis* [49].  
476 This gram-positive bacteria was originally isolated in Japan, but shown to grow in a variety  
477 of substrates [50] and its presence in the soil could select for naturally resistant  
478 nematodes. Additionally, synthetic anthelmintic compounds are common soil and water  
479 pollutants in some areas and can be found in runoff from farms that use anthelmintics to  
480 treat agriculture or livestock [51,52]. This exposure to the same selective pressures and  
481 the known genetic diversity in the *C. elegans* species suggests a method for how free-  
482 living nematodes might acquire variation in the same resistance genes or gene families  
483 as parasitic nematodes. In one example, it was shown that recent selective pressures  
484 have likely acted on the *C. elegans ben-1* locus, causing many novel putative loss-of-  
485 function alleles across the population despite evolutionary constraint on *ben-1* beta-  
486 tubulin function [20]. This conclusion again highlights the relevance of using the  
487 experimentally tractable *C. elegans* as a model to study anthelmintic resistance in  
488 parasitic nematode species.

489

#### 490 **Overlap of chromosome V macrocyclic lactone resistance loci between *C. elegans*** 491 **and *H. contortus***

492 Genome-wide analyses in both *C. elegans* and *H. contortus* identified  
493 chromosome V QTL. Because gene contents on chromosomes are highly conserved, we  
494 compared these QTL intervals to look for conserved candidate genes. We initially focused  
495 on one-to-one orthologs between the VL and VC QTL in *C. elegans* and both QTL in *H.*  
496 *contortus* and found 40 genes but none were obvious new candidates for ML resistance.



497 This finding does not eliminate the possibility that similar responses underlie the QTL in  
498 both species. The VL and VC QTL contain several gene families, including *ugt* and *cyp*  
499 genes, which have been implicated in resistance previously [53,54]. Gene families often  
500 evolve rapidly in response to the environment and are good candidates to confer  
501 resistance [55]. Because comparisons of all gene families or ortholog groups in the VL  
502 and VC QTL is difficult, we focused on ortholog groups for a subset of previously  
503 described candidate gene families (*ugt* and *cyp*). Neither of these families had orthologs  
504 in QTL for both species.

505 The absence of shared candidates between the QTL could be explained by the  
506 statistical nature of the mapping approaches. The glutamate-gated chloride channel  
507 subunit gene, *glc-3*, is located in the *C. elegans* VC QTL. Although the *H. contortus*  
508 ortholog *HCON\_00148840* is not located in one of the QTL, it is found on chromosome V  
509 to the left of the defined QTL region (27.6 Mb) and could underlie that QTL. Alternatively,  
510 *HCON\_00148840* could be a candidate gene but not vary in the *H. contortus* isolates  
511 used in the study [14]. Genome-wide association studies correlate genotype with  
512 phenotype. These studies depend on genetic variation in the tested strains and do not  
513 provide conclusive evidence on causal connections of candidate genes to resistance.  
514 Further studies should use additional *H. contortus* isolates to map genomic regions that  
515 correlate with ML resistance. The role of candidate genes such as *glc-3* should be tested  
516 in *C. elegans*.

517 When studies in *C. elegans* and *H. contortus* do point to the same candidate  
518 genes, variants that confer resistance in parasitic nematode species can be more easily  
519 validated in the experimentally tractable *C. elegans* model. We showed this approach by

520 testing the *T. circumcincta* candidate gene (*lgc-54*) for ML resistance in *C. elegans*. Our  
521 results suggest that loss of *lgc-54* does not cause increased resistance to abamectin in  
522 *C. elegans*. A possible caveat of this study is that the decreased fitness of these mutants  
523 make the results more difficult to interpret. However, the decreased fitness could also be  
524 indicative of an essential role of *lgc-54* in nematode fitness. This study demonstrates the  
525 power of functional validation in model systems like *C. elegans* to experimentally test  
526 hypotheses for candidate genes with one-to-one orthologs. To study the resistance  
527 conferred by genes that have multiple orthologs in one or both species, genome-editing  
528 could be used to make *C. elegans* gene content resemble parasitic nematodes [23,56].  
529 Additionally, CeNDR can be used to identify strains that have similar gene contents as  
530 found in *H. contortus* [39,57].

531

### 532 **Power of QTL mapping in *C. elegans* to identify causal genes underlying** 533 **anthelmintic resistance**

534 This study highlights the benefits of communication between the parasite and *C.*  
535 *elegans* communities. Genetic mappings, screens, and selections are more easily  
536 performed in free-living nematodes and ultimately discover drug targets and mechanisms  
537 of action. However, it is important that these findings are then translated back to parasitic  
538 nematodes to confirm that genes found in *C. elegans* are responsible for drug resistance  
539 in parasites. Alternatively, candidate genes can be identified from parasitic nematode field  
540 samples and direct *C. elegans* studies to test specific genes in anthelmintic resistance  
541 traits. The potential overlap between QTL for ML resistance in *C. elegans* and *H.*  
542 *contortus* [14] strengthens this approach and suggests that the variants in our mapping

543 population might also confer resistance in *H. contortus* and perhaps other parasitic  
544 nematode species. Future studies to discover the causal genes and variants underlying  
545 our two novel QTL (VL and VC) could be informative to parasitologists and help treat  
546 infected individuals more effectively.

547

## 548 **Materials and Methods**

### 549 **Strains**

550 Animals were grown on modified nematode growth media (NGMA) containing 1%  
551 agar and 0.7% agarose at 20°C and fed the *E. coli* strain OP50 [58]. A total of 225  
552 recombinant inbred advanced intercross lines (RIAILs) were assayed for QTL mapping  
553 (set 2 RIAILs) [31]. These RIAILs were derived from a cross between QX1430, which is  
554 a derivative of the canonical laboratory N2 strain that contains the CB4856 allele at the  
555 *npr-1* locus and a transposon insertion in *peel-1*, and a wild isolate from Hawaii (CB4856).  
556 A second set of 107 RIAILs generated previously between N2 and CB4856 [34] (set 1  
557 RIAILs) were phenotyped for mediation analysis. Near-isogenic lines (NILs) were  
558 generated previously by backcrossing a RIAIL of interest to either the N2 or CB4856 strain  
559 for several generations using PCR amplicons covering insertion-deletion (indels) variants  
560 to track the introgressed region [28]. NILs were whole-genome sequenced to verify that  
561 only the targeted introgressed regions had been crossed. The *lgc-54* mutant strains  
562 (FX3448 and FX3518) were obtained from the National BioResource Project (Japan). All  
563 NILs and resources used to generate NILs are listed in the Supplementary Material.  
564 Strains are available upon request or from the *C. elegans* Natural Diversity Resource  
565 (CeNDR, [elegansvariation.org](http://elegansvariation.org)) [57].

566

## 567 **High-throughput fitness assays**

568 A high-throughput fitness assay described previously [31] was used for all  
569 phenotyping assays. In summary, each strain was passaged and amplified on NGMA  
570 plates for four generations, bleach-synchronized, and 25-50 embryos were aliquoted into  
571 96-well microtiter plates at a final volume of 50  $\mu$ L K medium [59]. After 12 hours, arrested  
572 L1s were fed HB101 bacterial lysate (Pennsylvania State University Shared Fermentation  
573 Facility, State College, PA; [60]) at a final concentration of 5 mg/mL in K medium. Animals  
574 were grown for 48 hours at 20°C with constant shaking. Three L4 larvae were then sorted  
575 into new 96-well microtiter plates containing 10 mg/mL HB101 bacterial lysate, 50  $\mu$ M  
576 kanamycin, and either 1% DMSO or abamectin dissolved in 1% DMSO using a large-  
577 particle flow cytometer (COPAS BIOSORT, Union Biometrica; Holliston, MA). Sorted  
578 animals were grown for 96 hours at 20°C with constant shaking. The next generation of  
579 animals and the parents were treated with sodium azide (50 mM in 1X M9) to straighten  
580 their bodies for more accurate length measurements. Animal length (mean.TOF), optical  
581 density integrated over animal length (mean.EXT), and brood size (norm.n) were  
582 quantified for each well using the COPAS BIOSORT. Nematodes get longer (animal  
583 length) and become thicker and more complex (optical density) over developmental time,  
584 and these two traits are correlated with one another. Because these two traits are highly  
585 correlated, we also generated a fourth trait (mean.norm.EXT) that normalizes the optical  
586 density by length (EXT/TOF) in order to provide a means to compare optical densities  
587 regardless of animal lengths.

588 Phenotypic measurements collected by the BIOSORT were processed and  
589 analyzed using the R package *easysorter* [61] as described previously [28]. Differences  
590 among strains within the control conditions were controlled by subtracting the mean  
591 control-condition value from each drug-condition replicate for each strain using a linear  
592 model ( $drug\_phenotype \sim mean\_control\_phenotype$ ). In this way, we are addressing only  
593 the differences among strains that were caused by the drug condition and the variance in  
594 the control condition does not affect the variance in the drug condition. An R shiny web  
595 app was previously developed [38] to visualize the results from the high-throughput  
596 assays and can be found here: [https://andersen-lab.shinyapps.io/NIL\\_genopheno/](https://andersen-lab.shinyapps.io/NIL_genopheno/).

597

### 598 **Abamectin dose response**

599 Four genetically divergent strains (N2, CB4856, JU775, and DL238) were treated  
600 with increasing concentrations of abamectin using the standard high-throughput assay  
601 described above. A concentration of 5  $\mu$ M abamectin (Sigma, #31732-100MG) in DMSO  
602 was selected for the linkage mapping experiments and 7.5 nM abamectin in DMSO was  
603 selected for the genome-wide association mapping and NIL experiments. These  
604 concentrations provided a reproducible abamectin-specific effect that maximizes  
605 between-strain variation and minimizes within-strain variation across the three traits. The  
606 higher concentration in the linkage mapping experiment falls into the range of previously  
607 reported *in vitro* assays, and the lower concentration in the GWA assay was meant to  
608 capture a wider range of responses found in the natural population.

609

## 610 **Genome-wide association mapping**

611 A total of 210 wild isolates were phenotyped in both abamectin and DMSO using  
612 the standard high-throughput assay described above. A genome-wide association  
613 mapping was performed for animal optical density (mean.EXT), normalized optical  
614 density (mean.norm.EXT), length (mean.TOF), and brood size (norm.n) using the R  
615 package *cegwas2* (<https://github.com/AndersenLab/cegwas2-nf>) as described previously  
616 [27,33]. Genotype data were acquired from the latest VCF release (release 20200815)  
617 from CeNDR. We used BCFtools [62] to filter variants below a 5% minor allele frequency  
618 and variants with missing genotypes and used PLINK v1.9 [63,64] to prune genotypes  
619 using linkage disequilibrium. The additive kinship matrix was generated from the 21,342  
620 markers using the *A.mat* function in the *rrBLUP* R package [65]. Because these markers  
621 have high LD, we performed eigen decomposition of the correlation matrix of the  
622 genotype matrix to identify 963 independent tests [27]. We performed genome-wide  
623 association mapping using the *GWAS* function from the *rrBLUP* package. Significance  
624 was determined by an eigenvalue threshold set by the number of independent tests in the  
625 genotype matrix [27]. Confidence intervals were defined as +/- 150 SNVs from the  
626 rightmost and leftmost markers that passed the significance threshold.

627

## 628 **Linkage mapping**

629 A total of 225 RIALs [31] were phenotyped in abamectin and DMSO using the  
630 HTA described above. Linkage mapping was performed on the measured traits using the  
631 R package *linkagemapping* (<https://github.com/AndersenLab/linkagemapping>) as  
632 described previously [28,32]. The cross object derived from the whole-genome

633 sequencing of the RIALs containing 13,003 SNVs was merged with the RIAL  
634 phenotypes using the *merge\_pheno* function with the argument *set = 2*. A forward search  
635 (*fsearch* function) adapted from the *R/qtl* package [66] was used to calculate the logarithm  
636 of the odds (LOD) scores for each genetic marker and each trait as  $-n(\ln(1-R^2)/2\ln(10))$   
637 where R is the Pearson correlation coefficient between the RIAL genotypes at the marker  
638 and trait phenotypes [67]. A 5% genome-wide error rate was calculated by permuting the  
639 RIAL phenotypes 1000 times. QTL were identified as the genetic marker with the highest  
640 LOD score above the significance threshold. This marker was then integrated into the  
641 model as a cofactor and mapping was repeated iteratively until no further QTL were  
642 identified. Finally, the *annotate\_lods* function was used to calculate the effect size of each  
643 QTL and determine 95% confidence intervals defined by a 1.5 LOD drop from the peak  
644 marker using the argument *cutoff = "proximal"*.

645

## 646 **Mediation analysis**

647 107 RIALs (set 1 RIALs) were phenotyped in both abamectin and DMSO using  
648 the high-throughput assay described above. Microarray expression for 14,107 probes  
649 were previously collected from the set 1 RIALs [68], filtered [58], and mapped using  
650 linkage mapping with 13,003 SNPs [32]. Mediation scores were calculated with  
651 bootstrapping using *calc\_mediation* function from the *linkagemapping* R package which  
652 uses the *mediate* function from the *mediation* R package [69] as previously described [32]  
653 for each of the probes with an eQTL within a genomic region of interest. Briefly, a mediator  
654 model (expression ~ genotype) and an outcome model (phenotype ~ expression +  
655 genotype) were used to calculate the proportion of the QTL effect that can be explained

656 by variation in gene expression. All expression and eQTL data are accessible from the  
657 *linkagemapping* R package.

658

### 659 **Comparing macrocyclic lactone QTL between *C. elegans* and *H. contortus***

660 The *C. elegans* (WS273) and *H. contortus* (PRJEB506, WBPS15) [22] protein and  
661 GFF3 files were downloaded from WormBase [70] and WormBase ParaSite [71],  
662 respectively. The longest isoform of each protein-coding gene was selected using the  
663 `agat_sp_keep_longest_isoform.pl` script from AGAT (version 0.4.0) [72]. Filtered protein  
664 files were clustered into orthologous groups (OGs) using OrthoFinder (version 2.4.0;  
665 using the parameter `-og`) [73] and one-to-one OGs were selected. A Python script  
666 (available at [https://github.com/AndersenLab/abamectin\\_manuscript](https://github.com/AndersenLab/abamectin_manuscript)) was used to collect  
667 the coordinates of all *C. elegans* genes within one of the identified QTL along with the  
668 coordinates of the corresponding *H. contortus* orthologs. These coordinates were used  
669 to compare synteny between the *C. elegans* abamectin QTL defined here and the *H.*  
670 *contortus* ivermectin QTL defined previously [14] (V: 37-42 Mb and V: 45-48 Mb).

671

### 672 **Statistical analysis**

673 All gene position data for the *C. elegans* genome were collected using WormBase  
674 WS273. For NIL assays, complete pairwise strain comparisons were performed on drug  
675 residual phenotypes using a *TukeyHSD* function [74] on an ANOVA model with the  
676 formula *phenotype* ~ *strain*. All data and scripts to generate figures can be found at  
677 [https://github.com/AndersenLab/abamectin\\_manuscript](https://github.com/AndersenLab/abamectin_manuscript).

678



679 **Acknowledgements**

680 We would like to thank members of the Andersen laboratory for their helpful comments  
681 on the manuscript. We would also like to thank WormBase for hosting both parasite and  
682 *C. elegans* genomes and annotations and the *C. elegans* Natural Diversity Resource  
683 (NSF CSBR 1930382) for data and tools critical for our analysis. We would also like to  
684 thank the National BioResource Project (Japan) for the *lgc-54* mutant strains (FX3448  
685 and FX3518).

## 686 References

- 687 1. Hotez PJ, Alvarado M, Basáñez M-G, Bolliger I, Bourne R, Boussinesq M, et al.  
688 The global burden of disease study 2010: interpretation and implications for the  
689 neglected tropical diseases. *PLoS Negl Trop Dis*. 2014;8: e2865.  
690 doi:10.1371/journal.pntd.0002865
- 691 2. Kahn LP, Woodgate RG. Integrated parasite management: products for adoption  
692 by the Australian sheep industry. *Vet Parasitol*. 2012;186: 58–64.  
693 doi:10.1016/j.vetpar.2011.11.046
- 694 3. Sutherland IA, Leathwick DM. Anthelmintic resistance in nematode parasites of  
695 cattle: a global issue? *Trends Parasitol*. 2011;27: 176–181.  
696 doi:10.1016/j.pt.2010.11.008
- 697 4. Hotez PJ, Fenwick A, Savioli L, Molyneux DH. Rescuing the bottom billion through  
698 control of neglected tropical diseases. *Lancet*. 2009;373: 1570–1575.  
699 doi:10.1016/S0140-6736(09)60233-6
- 700 5. Lustigman S, Prichard RK, Gazzinelli A, Grant WN, Boatman BA, McCarthy JS, et al.  
701 A research agenda for helminth diseases of humans: the problem of helminthiasis.  
702 *PLoS Negl Trop Dis*. 2012;6: e1582. doi:10.1371/journal.pntd.0001582
- 703 6. Charlier J, van der Voort M, Kenyon F, Skuce P, Vercruyse J. Chasing helminths  
704 and their economic impact on farmed ruminants. *Trends Parasitol*. 2014;30: 361–  
705 367. doi:10.1016/j.pt.2014.04.009
- 706 7. Kotze AC, Prichard RK. Anthelmintic Resistance in *Haemonchus contortus*: History,  
707 Mechanisms and Diagnosis. *Adv Parasitol*. 2016;93: 397–428.  
708 doi:10.1016/bs.apar.2016.02.012
- 709 8. Ásbjörnsdóttir KH, Means AR, Werkman M, Walson JL. Prospects for elimination of  
710 soil-transmitted helminths. *Current Opinion in Infectious Diseases*. 2017. pp. 482–  
711 488. doi:10.1097/qco.0000000000000395
- 712 9. Orr AR, Quagraine JE, Suwondo P, George S, Harrison LM, Dornas FP, et al.  
713 Genetic Markers of Benzimidazole Resistance among Human Hookworms (*Necator*  
714 *americanus*) in Kintampo North Municipality, Ghana. *Am J Trop Med Hyg*.  
715 2019;100: 351–356. doi:10.4269/ajtmh.18-0727
- 716 10. Wolstenholme AJ, Fairweather I, Prichard R, von Samson-Himmelstjerna G,  
717 Sangster NC. Drug resistance in veterinary helminths. *Trends Parasitol*. 2004;20:  
718 469–476. doi:10.1016/j.pt.2004.07.010
- 719 11. McCavera S, Walsh TK, Wolstenholme AJ. Nematode ligand-gated chloride  
720 channels: an appraisal of their involvement in macrocyclic lactone resistance and  
721 prospects for developing molecular markers. *Parasitology*. 2007;134: 1111–1121.

- 722           doi:10.1017/S0031182007000042
- 723   12. Dent JA, Smith MM, Vassilatis DK, Avery L. The genetics of ivermectin resistance  
724   in *Caenorhabditis elegans*. *Proc Natl Acad Sci U S A*. 2000;97: 2674–2679.  
725   doi:10.1073/pnas.97.6.2674
- 726   13. Page AP. The sensory amphidial structures of *Caenorhabditis elegans* are involved  
727   in macrocyclic lactone uptake and anthelmintic resistance. *Int J Parasitol*. 2018;48:  
728   1035–1042. doi:10.1016/j.ijpara.2018.06.003
- 729   14. Doyle SR, Illingworth CJR, Laing R, Bartley DJ, Redman E, Martinelli A, et al.  
730   Population genomic and evolutionary modelling analyses reveal a single major QTL  
731   for ivermectin drug resistance in the pathogenic nematode, *Haemonchus contortus*.  
732   *BMC Genomics*. 2019;20: 218. doi:10.1186/s12864-019-5592-6
- 733   15. Rezansoff AM, Laing R, Gilleard JS. Evidence from two independent backcross  
734   experiments supports genetic linkage of microsatellite Hcms8a20, but not other  
735   candidate loci, to a major ivermectin resistance locus in *Haemonchus contortus*.  
736   *International Journal for Parasitology*. 2016. pp. 653–661.  
737   doi:10.1016/j.ijpara.2016.04.007
- 738   16. Choi Y-J, Bisset SA, Doyle SR, Hallsworth-Pepin K, Martin J, Grant WN, et al.  
739   Genomic introgression mapping of field-derived multiple-anthelmintic resistance in  
740   *Teladorsagia circumcincta*. *PLoS Genet*. 2017;13: e1006857.  
741   doi:10.1371/journal.pgen.1006857
- 742   17. Stear MJ, Boag B, Cattadori I, Murphy L. Genetic variation in resistance to mixed,  
743   predominantly *Teladorsagia circumcincta* nematode infections of sheep: from  
744   heritabilities to gene identification. *Parasite Immunol*. 2009;31: 274–282.  
745   doi:10.1111/j.1365-3024.2009.01105.x
- 746   18. Doyle SR, Bourguinat C, Nana-Djeunga HC, Kengne-Ouafo JA, Pion SDS, Bopda  
747   J, et al. Genome-wide analysis of ivermectin response by *Onchocerca volvulus*  
748   reveals that genetic drift and soft selective sweeps contribute to loss of drug  
749   sensitivity. *PLoS Negl Trop Dis*. 2017;11: e0005816.  
750   doi:10.1371/journal.pntd.0005816
- 751   19. Zamanian M, Cook DE, Zdraljevic S, Brady SC, Lee D, Lee J, et al. Discovery of  
752   genomic intervals that underlie nematode responses to benzimidazoles. *PLoS Negl*  
753   *Trop Dis*. 2018;12: e0006368. doi:10.1371/journal.pntd.0006368
- 754   20. Hahnel SR, Zdraljevic S, Rodriguez BC, Zhao Y, McGrath PT, Andersen EC.  
755   Extreme allelic heterogeneity at a *Caenorhabditis elegans* beta-tubulin locus  
756   explains natural resistance to benzimidazoles. *PLoS Pathog*. 2018;14: e1007226.  
757   doi:10.1371/journal.ppat.1007226
- 758   21. Gilleard JS. *Haemonchus contortus* as a paradigm and model to study anthelmintic  
759   drug resistance. *Parasitology*. 2013;140: 1506–1522.

- 760           doi:10.1017/S0031182013001145
- 761   22. Doyle SR, Tracey A, Laing R, Holroyd N, Bartley D, Bazant W, et al. Genomic and  
762 transcriptomic variation defines the chromosome-scale assembly of *Haemonchus*  
763 *contortus*, a model gastrointestinal worm. *Commun Biol.* 2020;3: 656.  
764 doi:10.1038/s42003-020-01377-3
- 765   23. Wit J, Dilks CM, Andersen EC. Complementary Approaches with Free-living and  
766 Parasitic Nematodes to Understanding Anthelmintic Resistance. *Trends Parasitol.*  
767 2020. doi:10.1016/j.pt.2020.11.008
- 768   24. Ghosh R, Andersen EC, Shapiro JA, Gerke JP, Kruglyak L. Natural variation in a  
769 chloride channel subunit confers avermectin resistance in *C. elegans*. *Science.*  
770 2012;335: 574–578. doi:10.1126/science.1214318
- 771   25. Dilks CM, Hahnel SR, Sheng Q, Long L, McGrath PT, Andersen EC. Quantitative  
772 benzimidazole resistance and fitness effects of parasitic nematode beta-tubulin  
773 alleles. *bioRxiv.* 2020. p. 2020.07.07.191866. doi:10.1101/2020.07.07.191866
- 774   26. Burga A, Ben-David E, Lemus Vergara T, Boocock J, Kruglyak L. Fast genetic  
775 mapping of complex traits in *C. elegans* using millions of individuals in bulk. *Nat*  
776 *Commun.* 2019;10: 2680. doi:10.1038/s41467-019-10636-9
- 777   27. Zdraljevic S, Fox BW, Strand C, Panda O, Tenjo FJ, Brady SC, et al. Natural  
778 variation in *C. elegans* arsenic toxicity is explained by differences in branched chain  
779 amino acid metabolism. *Elife.* 2019;8. doi:10.7554/eLife.40260
- 780   28. Brady SC, Zdraljevic S, Bisaga KW, Tanny RE, Cook DE, Lee D, et al. A Novel  
781 Gene Underlies Bleomycin-Response Variation in *Caenorhabditis elegans*.  
782 *Genetics.* 2019;212: 1453–1468. doi:10.1534/genetics.119.302286
- 783   29. Evans KS, Brady SC, Bloom JS, Tanny RE, Cook DE, Giuliani SE, et al. Shared  
784 Genomic Regions Underlie Natural Variation in Diverse Toxin Responses.  
785 *Genetics.* 2018. doi:10.1534/genetics.118.301311
- 786   30. Zdraljevic S, Strand C, Seidel HS, Cook DE, Doench JG, Andersen EC. Natural  
787 variation in a single amino acid substitution underlies physiological responses to  
788 topoisomerase II poisons. *PLoS Genet.* 2017;13: e1006891.  
789 doi:10.1371/journal.pgen.1006891
- 790   31. Andersen EC, Shimko TC, Crissman JR, Ghosh R, Bloom JS, Seidel HS, et al. A  
791 Powerful New Quantitative Genetics Platform, Combining *Caenorhabditis elegans*  
792 High-Throughput Fitness Assays with a Large Collection of Recombinant Strains.  
793 *G3.* 2015;5: 911–920. doi:10.1534/g3.115.017178
- 794   32. Evans KS, Andersen EC. The Gene *scb-1* Underlies Variation in *Caenorhabditis*  
795 *elegans* Chemotherapeutic Responses. *G3.* 2020. doi:10.1534/g3.120.401310

- 796 33. Evans KS, Zdraljevic S, Stevens L, Collins K, Tanny RE, Andersen EC. Natural  
797 variation in the sequestosome-related gene, sqst-5, underlies zinc homeostasis in  
798 *Caenorhabditis elegans*. *bioRxiv*. 2020. p. 2020.07.10.196857.  
799 doi:10.1101/2020.07.10.196857
- 800 34. Rockman MV, Kruglyak L. Recombinational landscape and population genomics of  
801 *Caenorhabditis elegans*. *PLoS Genet*. 2009;5: e1000419.  
802 doi:10.1371/journal.pgen.1000419
- 803 35. Stasiuk SJ, MacNevin G, Workentine ML, Gray D, Redman E, Bartley D, et al.  
804 Similarities and differences in the biotransformation and transcriptomic responses  
805 of *Caenorhabditis elegans* and *Haemonchus contortus* to five different  
806 benzimidazole drugs. *Int J Parasitol Drugs Drug Resist*. 2019;11: 13–29.  
807 doi:10.1016/j.ijpddr.2019.09.001
- 808 36. Hansen M, Hsu A-L, Dillin A, Kenyon C. New genes tied to endocrine, metabolic,  
809 and dietary regulation of lifespan from a *Caenorhabditis elegans* genomic RNAi  
810 screen. *PLoS Genet*. 2005;1: 119–128. doi:10.1371/journal.pgen.0010017
- 811 37. Maglioni S, Schiavi A, Melcher M, Brinkmann V, Luo Z, Raimundo N, et al. Lutein  
812 restores synaptic functionality in a *C. elegans* model for mitochondrial complex I  
813 deficiency. doi:10.1101/2020.02.20.957225
- 814 38. Evans KS, Zdraljevic S, Stevens L, Collins K, Tanny RE, Andersen EC. Natural  
815 variation in the sequestosome-related gene, sqst-5, underlies zinc homeostasis in  
816 *Caenorhabditis elegans*. *PLoS Genet*. 2020;16: e1008986.  
817 doi:10.1371/journal.pgen.1008986
- 818 39. Lee D, Zdraljevic S, Stevens L, Wang Y, Tanny RE, Crombie TA, et al. Balancing  
819 selection maintains ancient genetic diversity in *C. elegans*. 2020. p.  
820 2020.07.23.218420. doi:10.1101/2020.07.23.218420
- 821 40. Horoszok L, Raymond V, Sattelle DB, Wolstenholme AJ. GLC-3: a novel fipronil  
822 and BIDN-sensitive, but picrotoxinin-insensitive, L-glutamate-gated chloride  
823 channel subunit from *Caenorhabditis elegans*. *Br J Pharmacol*. 2001;132: 1247–  
824 1254. doi:10.1038/sj.bjp.0703937
- 825 41. Bernstein MR, Zdraljevic S, Andersen EC, Rockman MV. Tightly linked  
826 antagonistic-effect loci underlie polygenic phenotypic variation in *C. elegans*. *Evol*  
827 *Lett*. 2019;3: 462–473. doi:10.1002/evl3.139
- 828 42. Redman E, Whitelaw F, Tait A, Burgess C, Bartley Y, Skuce PJ, et al. The  
829 emergence of resistance to the benzimidazole anthelmintics in parasitic nematodes  
830 of livestock is characterised by multiple independent hard and soft selective  
831 sweeps. *PLoS Negl Trop Dis*. 2015;9: e0003494. doi:10.1371/journal.pntd.0003494
- 832 43. Gilleard JS, Redman E. Chapter Two - Genetic Diversity and Population Structure  
833 of *Haemonchus contortus*. In: Gasser RB, Samson-Himmelstjerna GV, editors.

- 834 Advances in Parasitology. Academic Press; 2016. pp. 31–68.  
835 doi:10.1016/bs.apar.2016.02.009
- 836 44. Frézal L, Félix M-A. C. elegans outside the Petri dish. *Elife*. 2015;4.  
837 doi:10.7554/eLife.05849
- 838 45. Crombie TA, Zdraljevic S, Cook DE, Tanny RE, Brady SC, Wang Y, et al. Deep  
839 sampling of Hawaiian *Caenorhabditis elegans* reveals high genetic diversity and  
840 admixture with global populations. *Elife*. 2019;8: e50465. doi:10.7554/eLife.50465
- 841 46. Campbell WC. History of avermectin and ivermectin, with notes on the history of  
842 other macrocyclic lactone antiparasitic agents. *Curr Pharm Biotechnol*. 2012;13:  
843 853–865. doi:10.2174/138920112800399095
- 844 47. Campbell WC. Serendipity and new drugs for infectious disease. *ILAR J*. 2005;46:  
845 352–356. doi:10.1093/ilar.46.4.352
- 846 48. Alivisatos SG, Lamantia L, Matijevitch BL. Imidazolytic processes. VI. Enzymic  
847 formation of benzimidazole and 5,6-dimethylbenzimidazole containing  
848 dinucleotides. *Biochim Biophys Acta*. 1962;58: 209–217. doi:10.1016/0006-  
849 3002(62)91000-4
- 850 49. Ōmura S, Crump A. The life and times of ivermectin — a success story. *Nature*  
851 *Reviews Microbiology*. 2004. pp. 984–989. doi:10.1038/nrmicro1048
- 852 50. Burg RW, Miller BM, Baker EE, Birnbaum J, Currie SA, Hartman R, et al.  
853 Avermectins, new family of potent anthelmintic agents: producing organism and  
854 fermentation. *Antimicrob Agents Chemother*. 1979;15: 361–367.  
855 doi:10.1128/aac.15.3.361
- 856 51. Cycoń M, Mroziak A, Piotrowska-Seget Z. Bioaugmentation as a strategy for the  
857 remediation of pesticide-polluted soil: A review. *Chemosphere*. 2017;172: 52–71.  
858 doi:10.1016/j.chemosphere.2016.12.129
- 859 52. Taube J, Vorkamp K, Förster M, Herrmann R. Pesticide residues in biological  
860 waste. *Chemosphere*. 2002;49: 1357–1365. doi:10.1016/s0045-6535(02)00503-9
- 861 53. Whittaker JH, Carlson SA, Jones DE, Brewer MT. Molecular mechanisms for  
862 anthelmintic resistance in strongyle nematode parasites of veterinary importance. *J*  
863 *Vet Pharmacol Ther*. 2017;40: 105–115. doi:10.1111/jvp.12330
- 864 54. Matoušková P, Vokřál I, Lamka J, Skálová L. The Role of Xenobiotic-Metabolizing  
865 Enzymes in Anthelmintic Deactivation and Resistance in Helminths. *Trends*  
866 *Parasitol*. 2016;32: 481–491. doi:10.1016/j.pt.2016.02.004
- 867 55. Curran DM, Gilleard JS, Wasmuth JD. MIPhy: identify and quantify rapidly evolving  
868 members of large gene families. *PeerJ*. 2018;6: e4873. doi:10.7717/peerj.4873



- 869 56. Zamanian M, Andersen EC. Prospects and challenges of CRISPR/Cas genome  
870 editing for the study and control of neglected vector-borne nematode diseases. The  
871 FEBS Journal. 2016. pp. 3204–3221. doi:10.1111/febs.13781
- 872 57. Cook DE, Zdraljevic S, Roberts JP, Andersen EC. CeNDR, the *Caenorhabditis*  
873 *elegans* natural diversity resource. Nucleic Acids Res. 2016.  
874 doi:10.1093/nar/gkw893
- 875 58. Andersen EC, Bloom JS, Gerke JP, Kruglyak L. A variant in the neuropeptide  
876 receptor *npr-1* is a major determinant of *Caenorhabditis elegans* growth and  
877 physiology. PLoS Genet. 2014;10: e1004156. doi:10.1371/journal.pgen.1004156
- 878 59. Boyd WA, Smith MV, Freedman JH. *Caenorhabditis elegans* as a model in  
879 developmental toxicology. Methods Mol Biol. 2012;889: 15–24. doi:10.1007/978-1-  
880 61779-867-2\_3
- 881 60. García-González AP, Ritter AD, Shrestha S, Andersen EC, Yilmaz LS, Walhout  
882 AJM. Bacterial Metabolism Affects the *C. elegans* Response to Cancer  
883 Chemotherapeutics. Cell. 2017;169: 431–441.e8. doi:10.1016/j.cell.2017.03.046
- 884 61. Shimko TC, Andersen EC. COPASutils: an R package for reading, processing, and  
885 visualizing data from COPAS large-particle flow cytometers. PLoS One. 2014;9:  
886 e111090. doi:10.1371/journal.pone.0111090
- 887 62. Li H. A statistical framework for SNP calling, mutation discovery, association  
888 mapping and population genetical parameter estimation from sequencing data.  
889 Bioinformatics. 2011;27: 2987–2993. doi:10.1093/bioinformatics/btr509
- 890 63. Purcell S, Neale B, Todd-Brown K, Thomas L, Ferreira MAR, Bender D, et al.  
891 PLINK: a tool set for whole-genome association and population-based linkage  
892 analyses. Am J Hum Genet. 2007;81: 559–575. doi:10.1086/519795
- 893 64. Chang CC, Chow CC, Tellier LC, Vattikuti S, Purcell SM, Lee JJ. Second-  
894 generation PLINK: rising to the challenge of larger and richer datasets.  
895 Gigascience. 2015;4: 7. doi:10.1186/s13742-015-0047-8
- 896 65. Endelman JB. Ridge Regression and Other Kernels for Genomic Selection with R  
897 Package rrBLUP. Plant Genome. 2011;4: 250–255.  
898 doi:10.3835/plantgenome2011.08.0024
- 899 66. Broman KW, Wu H, Sen S, Churchill GA. R/qtl: QTL mapping in experimental  
900 crosses. Bioinformatics. 2003;19: 889–890. Available:  
901 <https://www.ncbi.nlm.nih.gov/pubmed/12724300>
- 902 67. Bloom JS, Ehrenreich IM, Loo WT, Lite T-LV, Kruglyak L. Finding the sources of  
903 missing heritability in a yeast cross. Nature. 2013;494: 234–237.  
904 doi:10.1038/nature11867

- 905 68. Rockman MV, Skrovaneck SS, Kruglyak L. Selection at linked sites shapes heritable  
906 phenotypic variation in *C. elegans*. *Science*. 2010;330: 372–376.  
907 doi:10.1126/science.1194208
- 908 69. Tingley D, Yamamoto T, Hirose K, Keele L, Imai K. mediation: R Package for  
909 Causal Mediation Analysis. *Journal of Statistical Software, Articles*. 2014;59: 1–38.  
910 doi:10.18637/jss.v059.i05
- 911 70. Harris TW, Arnaboldi V, Cain S, Chan J, Chen WJ, Cho J, et al. WormBase: a  
912 modern Model Organism Information Resource. *Nucleic Acids Res*. 2020;48:  
913 D762–D767. doi:10.1093/nar/gkz920
- 914 71. Howe KL, Bolt BJ, Shafie M, Kersey P, Berriman M. WormBase ParaSite - a  
915 comprehensive resource for helminth genomics. *Mol Biochem Parasitol*. 2017;215:  
916 2–10. doi:10.1016/j.molbiopara.2016.11.005
- 917 72. Dainat J, Hereñú D, Pucholt P. NBISweden/AGAT: AGAT-v0.5.1. 2020.  
918 doi:10.5281/zenodo.4205393
- 919 73. Emms DM, Kelly S. OrthoFinder: phylogenetic orthology inference for comparative  
920 genomics. *Genome Biol*. 2019;20: 238. doi:10.1186/s13059-019-1832-y
- 921 74. R Core Team. R: A Language and Environment for Statistical Computing. Vienna,  
922 Austria: R Foundation for Statistical Computing; 2017. Available: [https://www.R-](https://www.R-project.org/)  
923 [project.org/](https://www.R-project.org/)

924



## 925 **Supporting information captions**

926 **S1 Fig. Dose response with four divergent wild isolates.** Results from the abamectin  
927 dose response HTA for brood size (norm.n), animal length (mean.TOF), animal optical  
928 density (mean.EXT), and normalized optical density (mean.norm.EXT) are shown. For  
929 each trait, drug concentration (nM) (x-axis) is plotted against phenotype subtracted from  
930 control (y-axis) and colored by strain (CB4856: blue, DL238: green, JU775: purple, N2:  
931 orange). A concentration of 7.5 nM was chosen for future experiments.

932 **S2 Fig. Genome-wide association mappings identify six QTL across three traits in**  
933 **response to abamectin. A)** Normalized residual phenotype (y-axis) of 210 wild isolates  
934 (x-axis) in response to abamectin. **B)** Association mapping results are shown. Genomic  
935 position (x-axis) is plotted against the  $-\log_{10}(p)$  value (y-axis) for each SNV. SNVs are  
936 colored pink if they pass the genome-wide eigen-decomposition significance threshold  
937 designated by the grey line. The genomic regions of interest that pass the significance  
938 threshold are highlighted by pink rectangles. **C)** For each QTL, the normalized residual  
939 phenotype (y-axis) of strains split by genotype at the peak marker (x-axis) are plotted as  
940 Tukey box plots. Each point corresponds to a wild isolate strain. Strains with the N2  
941 reference allele are colored grey, and strains with an alternative allele are colored pink.

942 **S3 Fig. Linkage mapping identifies 14 QTL across four traits in response to**  
943 **abamectin. A)** Normalized residual phenotype (y-axis) of 225 RIALs (x-axis) in response  
944 to abamectin. The parental strains are colored: N2, orange; CB4856, blue. **B)** Linkage  
945 mapping results are shown. Genomic position in Mb (x-axis) is plotted against the  
946 logarithm of the odds (LOD) score (y-axis) for 13,003 genomic markers. Each significant  
947 QTL is indicated by a red triangle at the peak marker, and a blue rectangle shows the

948 95% confidence interval around the peak marker. The percentage of the total variance in  
949 the RIAL population that can be explained by each QTL is shown above the QTL. **C)** For  
950 each QTL, the normalized residual phenotype (y-axis) of RIALs split by genotype at the  
951 marker with the maximum LOD score (x-axis) are plotted as Tukey box plots. Each point  
952 corresponds to a unique recombinant strain. Strains with the N2 allele are colored orange,  
953 and strains with the CB4856 allele are colored blue.

954 **S4 Fig. Summary of QTL mapping for responses to abamectin.** Genomic positions  
955 (x-axis) of all QTL identified from linkage mapping (top) and association mapping (bottom)  
956 are shown for each drug-trait (y-axis). Each QTL is plotted as a point at the genomic  
957 location of the peak marker and a line that represents the confidence interval. QTL are  
958 colored by the significance of the LOD score (linkage) or  $-\log_{10}(p)$  value (association),  
959 increasing from purple to green to yellow.

960 **S5 Fig. Two-dimensional genome scan for mean optical density (mean.EXT) in**  
961 **abamectin.** Log of the odds (LOD) scores are shown for each pairwise combination of  
962 loci, split by chromosome. The upper-left triangle contains the epistasis LOD scores  
963 (interaction effects), and the lower-right triangle contains the LOD scores for the full model  
964 (both interaction and additive effects). LOD scores are colored by significance, increasing  
965 from purple to green to yellow. The LOD scores for the epistasis model are shown on the  
966 left of the color scale, and the LOD scores for the full model are shown on the right.

967 **S6 Fig. Chromosome substitution strains validate the existence of one or more**  
968 **resistance loci on chromosome V. A)** Strain genotypes are shown as colored  
969 rectangles (N2: orange, CB4856: blue) in detail for chromosome V (left) and in general  
970 for the rest of the chromosomes (right). **B)** Normalized residual mean lengths in

971 abamectin (mean.TOF, x-axis) are plotted as Tukey box plots against strain (y-axis).  
972 Statistical significance of each NIL as compared to its parental strain (ECA573 to N2 and  
973 ECA554 to CB4856) calculated by Tukey's HSD is shown above each strain (ns = non-  
974 significant (p-value > 0.05); \*, \*\*, \*\*\*, and \*\*\*\* = significant (p-value < 0.05, 0.01, 0.001, or  
975 0.0001, respectively).

976 **S7 Fig. Refining QTL positions with NILs. A)** Fine mapping of all common variants on  
977 chromosome V is shown. Genomic position (x-axis) is plotted against the  $-\log_{10}(p)$  values  
978 (y-axis) for each variant and colored by the genotype of the variant in the CB4856 strain  
979 (grey = N2 reference allele, blue = variation from the N2 reference allele). Genomic  
980 regions identified from linkage mapping analysis are highlighted in blue and genomic  
981 regions identified from association mapping are highlighted in pink. The horizontal grey  
982 line represents the genome-wide eigen-decomposition significance threshold. The red  
983 points represent the positions of the most significant variants in the genes *glc-1*  
984 (diamond), *glc-3* (circle), and *lglc-54* (square). The vertical lines represent the smallest  
985 NIL-defined genomic region for the VL (solid), VC (dashed), and VR (dotted) QTL. **B)**  
986 Strain genotypes are shown as colored rectangles (N2: orange, CB4856: blue) in detail  
987 for chromosome V. The vertical lines represent the smallest NIL-defined genomic region  
988 for the VL (solid), VC (dashed), and VR (dotted) QTL.

989 **S8 Fig. Mediation analysis for the VL and VC QTL.** Mediation estimates calculated as  
990 the indirect effect that differences in expression of each gene plays in the overall  
991 phenotype (y-axis) are plotted against genomic position of the eQTL (x-axis) on  
992 chromosome V for all genes with a gene expression QTL in the narrowed VL and VC  
993 intervals. The 90th percentile of the distribution of mediation estimates is represented by

994 the horizontal grey line. The confidence of the estimate increases ( $p$ -value decreases) as  
995 points become more solid.

996 **S9 Fig. NILs validate and narrow the VC QTL. A)** Strain genotypes are shown as  
997 colored rectangles (N2: orange, CB4856: blue) in detail for chromosome V (left) and in  
998 general for the rest of the chromosomes (right). The dashed vertical lines represent the  
999 previous NIL-defined QTL interval for VC. **B)** Normalized residual mean optical densities  
1000 in abamectin (mean.EXT, x-axis) are plotted as Tukey box plots against strain (y-axis).  
1001 Statistical significance of each NIL as compared to the N2 strain calculated by Tukey's  
1002 HSD is shown above each strain (ns = non-significant ( $p$ -value > 0.05); \*, \*\*, \*\*\*, and \*\*\*  
1003 = significant ( $p$ -value < 0.05, 0.01, 0.001, or 0.0001, respectively).

1004 **S1 File. Dose response phenotype data.** Results of the dose response for the genome-  
1005 wide association high-throughput fitness assay

1006 **S2 File. Wild isolate phenotype data.** Residual phenotypic values for the 210 wild  
1007 isolates in response to abamectin

1008 **S3 File. Association mapping results.** Genome-wide association mapping results for  
1009 all four drug-response traits tested in the high-throughput fitness assay

1010 **S4 File. RIAL phenotype data.** Residual phenotypic values for the 225 set 2 RIALs in  
1011 response to abamectin

1012 **S5 File. Linkage mapping results.** Linkage mapping LOD scores at 13,003 genomic  
1013 markers for all four drug-response traits with the set 2 RIALs

1014 **S6 File. Summary of two-dimensional genome scan.** Summary of the scan2 object  
1015 containing data from the two-dimensional genome scan with animal optical density  
1016 (mean.EXT) in abamectin

1017 **S7 File. Chromosome V variants.** Correlation values and annotations for all variants on  
1018 chromosome V

1019 **S8 File. NIL sequence data.** VCF from the whole-genome sequencing for all the NILs in  
1020 this study

1021 **S9 File. NIL genotype data.** Simplified genotypes of the NILs in the study

1022 **S10 File. CSSV phenotype data.** Raw pruned phenotypes for the high-throughput fitness  
1023 assay with the chromosome V substitution strains

1024 **S11 File. Statistical significance for NIL assays.** Pairwise statistical significance for all  
1025 strains and high-throughput assays

1026 **S12 File. ChrV NIL breakup phenotype data.** Raw pruned phenotypes for the NILs used  
1027 to break up the QTL interval on chromosome V

1028 **S13 File. Candidate genes on chrV.** List of all genes in the chromosome VL and VC  
1029 intervals, their functional descriptions and GO annotations, and if they have variation in  
1030 CB4856

1031 **S14 File. Set 1 RIAIL phenotype data.** Residual phenotypic values for the 107 set 1  
1032 RIAILs in response to abamectin

1033 **S15 File. Mediation estimates for chrV QTL.** Mediation estimates for the chromosome  
1034 VL and VC QTL

1035 **S16 File. NILs to narrow VC QTL.** Raw pruned phenotypes for the chromosome VC NIL  
1036 high-throughput fitness assay

1037 **S17 File. Igc-54 mutant phenotypes.** Raw pruned phenotypes for the the Igc-54 deletion  
1038 strains high-throughput fitness assay

1039 **S18 File. One-to-one orthologous genes in *H. contortus*.** Coordinates and orthologous  
1040 relationships for *H. contortus* QTL  
1041 **S19 File. Orthogroups for *H. contortus* and *C. elegans* genes.** Contains a list of all  
1042 the genes found in each orthogroup between *C. elegans* and *H. contortus*
